# Supplementary material
Source: publisher figshare collection journal article supplement (https://acs.figshare.com/ndownloader/files/5341393)
Supplement: Supplementary file 1 [file 5341393]

Synthesis and Properties of an Unusual New High Symmetry Osmium-Palladium Carbonyl Cluster Complex  

Richard D. Adams, Erin Boswell and Burjor Captain 
Department of Chemistry and Biochemistry, 
University of South Carolina, 
Columbia SC 29208
 


data_i-43m 
 
_audit_creation_method            SHELXL-97 
_chemical_name_systematic 
; 
 ? 
; 
_chemical_name_common             ? 
_chemical_melting_point           ? 
_chemical_formula_moiety          ? 
_chemical_formula_sum 
 'C60 H108 O12 Os4 P4 Pd4' 
_chemical_formula_weight          2331.74 
 
loop_ 
 _atom_type_symbol 
 _atom_type_description 
 _atom_type_scat_dispersion_real 
 _atom_type_scat_dispersion_imag 
 _atom_type_scat_source 
 'C'  'C'   0.0033   0.0016 
 'International Tables Vol C Tables 4.2.6.8 and 6.1.1.4' 
 'H'  'H'   0.0000   0.0000 
 'International Tables Vol C Tables 4.2.6.8 and 6.1.1.4' 
 'O'  'O'   0.0106   0.0060 
 'International Tables Vol C Tables 4.2.6.8 and 6.1.1.4' 
 'P'  'P'   0.1023   0.0942 
 'International Tables Vol C Tables 4.2.6.8 and 6.1.1.4' 
 'Pd'  'Pd'  -0.9988   1.0072 
 'International Tables Vol C Tables 4.2.6.8 and 6.1.1.4' 
 'Os'  'Os'  -1.2165   7.6030 
 'International Tables Vol C Tables 4.2.6.8 and 6.1.1.4' 
 
_symmetry_cell_setting            Cubic 
_symmetry_space_group_name_H-M    I-43m 
 
loop_ 
 _symmetry_equiv_pos_as_xyz 
 'x, y, z' 
 '-x, -y, z' 
 '-x, y, -z' 
 'x, -y, -z' 
 'z, x, y' 
 'z, -x, -y' 
 '-z, -x, y' 
 '-z, x, -y' 
 'y, z, x' 
 '-y, z, -x' 
 'y, -z, -x' 
 '-y, -z, x' 
 'y, x, z' 
 '-y, -x, z' 
 'y, -x, -z' 
 '-y, x, -z' 
 'x, z, y' 
 '-x, z, -y' 
 '-x, -z, y' 
 'x, -z, -y' 
 'z, y, x' 
 'z, -y, -x' 
 '-z, y, -x' 
 '-z, -y, x' 
 'x+1/2, y+1/2, z+1/2' 
 '-x+1/2, -y+1/2, z+1/2' 
 '-x+1/2, y+1/2, -z+1/2' 
 'x+1/2, -y+1/2, -z+1/2' 
 'z+1/2, x+1/2, y+1/2' 
 'z+1/2, -x+1/2, -y+1/2' 
 '-z+1/2, -x+1/2, y+1/2' 
 '-z+1/2, x+1/2, -y+1/2' 
 'y+1/2, z+1/2, x+1/2' 
 '-y+1/2, z+1/2, -x+1/2' 
 'y+1/2, -z+1/2, -x+1/2' 
 '-y+1/2, -z+1/2, x+1/2' 
 'y+1/2, x+1/2, z+1/2' 
 '-y+1/2, -x+1/2, z+1/2' 
 'y+1/2, -x+1/2, -z+1/2' 
 '-y+1/2, x+1/2, -z+1/2' 
 'x+1/2, z+1/2, y+1/2' 
 '-x+1/2, z+1/2, -y+1/2' 
 '-x+1/2, -z+1/2, y+1/2' 
 'x+1/2, -z+1/2, -y+1/2' 
 'z+1/2, y+1/2, x+1/2' 
 'z+1/2, -y+1/2, -x+1/2' 
 '-z+1/2, y+1/2, -x+1/2' 
 '-z+1/2, -y+1/2, x+1/2' 
 
_cell_length_a                    16.4893(2) 
_cell_length_b                    16.4893(2) 
_cell_length_c                    16.4893(2) 
_cell_angle_alpha                 90.00 
_cell_angle_beta                  90.00 
_cell_angle_gamma                 90.00 
_cell_volume                      4483.39(9) 
_cell_formula_units_Z             2 
_cell_measurement_temperature     293(2) 
_cell_measurement_reflns_used     2316 
_cell_measurement_theta_min       2.47 
_cell_measurement_theta_max       28.23 
 
_exptl_crystal_description        block 
_exptl_crystal_colour             dark 
_exptl_crystal_size_max           0.30 
_exptl_crystal_size_mid           0.25 
_exptl_crystal_size_min           0.20 
_exptl_crystal_density_meas       ? 
_exptl_crystal_density_diffrn     1.727 
_exptl_crystal_density_method     'not measured' 
_exptl_crystal_F_000              2224 
_exptl_absorpt_coefficient_mu     6.541 
_exptl_absorpt_correction_type    Multi-Scan 
_exptl_absorpt_correction_T_min   0.673 
_exptl_absorpt_correction_T_max   1.000 
_exptl_absorpt_process_details    ? 
 
_exptl_special_details 
; 
 ? 
; 
 
_diffrn_ambient_temperature       293(2) 
_diffrn_radiation_wavelength      0.71073 
_diffrn_radiation_type            MoK\a 
_diffrn_radiation_source          'fine-focus sealed tube' 
_diffrn_radiation_monochromator   graphite 
_diffrn_measurement_device_type   ? 
_diffrn_measurement_method        ? 
_diffrn_detector_area_resol_mean  ? 
_diffrn_standards_number          ? 
_diffrn_standards_interval_count  ? 
_diffrn_standards_interval_time   ? 
_diffrn_standards_decay_%         <1 
_diffrn_reflns_number             16758 
_diffrn_reflns_av_R_equivalents   0.0242 
_diffrn_reflns_av_sigmaI/netI     0.0187 
_diffrn_reflns_limit_h_min        -21 
_diffrn_reflns_limit_h_max        21 
_diffrn_reflns_limit_k_min        -21 
_diffrn_reflns_limit_k_max        20 
_diffrn_reflns_limit_l_min        -16 
_diffrn_reflns_limit_l_max        21 
_diffrn_reflns_theta_min          2.47 
_diffrn_reflns_theta_max          28.30 
_reflns_number_total              1052 
_reflns_number_gt                 1037 
_reflns_threshold_expression      >2sigma(I) 
 
_computing_data_collection        ? 
_computing_cell_refinement        ? 
_computing_data_reduction         ? 
_computing_structure_solution     'SHELXS-97 (Sheldrick, 1990)' 
_computing_structure_refinement   'SHELXL-97 (Sheldrick, 1997)' 
_computing_molecular_graphics     ? 
_computing_publication_material   ? 
 
_refine_special_details 
; 
 Refinement of F^2^ against ALL reflections.  The weighted R-factor wR and 
 goodness of fit S are based on F^2^, conventional R-factors R are based 
 on F, with F set to zero for negative F^2^. The threshold expression of 
 F^2^ > 2sigma(F^2^) is used only for calculating R-factors(gt) etc. and is 
 not relevant to the choice of reflections for refinement.  R-factors based 
 on F^2^ are statistically about twice as large as those based on F, and R- 
 factors based on ALL data will be even larger. 
; 
 
_refine_ls_structure_factor_coef  Fsqd  
_refine_ls_matrix_type            full 
_refine_ls_weighting_scheme       calc  
_refine_ls_weighting_details 
 'calc w=1/[\s^2^(Fo^2^)+(0.0471P)^2^+5.3408P] where P=(Fo^2^+2Fc^2^)/3' 
_atom_sites_solution_primary      direct 
_atom_sites_solution_secondary    difmap 
_atom_sites_solution_hydrogens    geom 
_refine_ls_hydrogen_treatment     constr 
_refine_ls_extinction_method      none 
_refine_ls_extinction_coef        ? 
_refine_ls_abs_structure_details 
 'Flack H D (1983), Acta Cryst. A39, 876-881' 
_refine_ls_abs_structure_Flack    0.010(17) 
_refine_ls_number_reflns          1052 
_refine_ls_number_parameters      61 
_refine_ls_number_restraints      6 
_refine_ls_R_factor_all           0.0224 
_refine_ls_R_factor_gt            0.0221 
_refine_ls_wR_factor_ref          0.0883 
_refine_ls_wR_factor_gt           0.0881 
_refine_ls_goodness_of_fit_ref    1.494 
_refine_ls_restrained_S_all       1.500 
_refine_ls_shift/su_max           0.003 
_refine_ls_shift/su_mean          0.001 
 
loop_ 
 _atom_site_label 
 _atom_site_type_symbol 
 _atom_site_fract_x 
 _atom_site_fract_y 
 _atom_site_fract_z 
 _atom_site_U_iso_or_equiv 
 _atom_site_adp_type 
 _atom_site_occupancy 
 _atom_site_symmetry_multiplicity 
 _atom_site_calc_flag 
 _atom_site_refinement_flags 
 _atom_site_disorder_assembly 
 _atom_site_disorder_group 
Os1 Os 0.438602(15) 0.438602(15) 0.561398(15) 0.02833(16) Uani 1 6 d S . . 
Pd1 Pd 0.40014(4) 0.40014(4) 0.40014(4) 0.0398(3) Uani 1 6 d S . . 
P1 P 0.31508(15) 0.31508(15) 0.31508(15) 0.0474(9) Uani 1 6 d S . . 
O11 O 0.4370(4) 0.4370(4) 0.7454(4) 0.065(2) Uani 1 2 d S . . 
C1 C 0.3784(9) 0.2695(8) 0.2264(8) 0.059(4) Uani 0.50 1 d PD A -1 
C2 C 0.4606(9) 0.2439(11) 0.2641(12) 0.062(7) Uani 0.50 1 d PD A -1 
H2A H 0.5019 0.2445 0.2231 0.093 Uiso 0.50 1 calc PR A -1 
H2B H 0.4560 0.1903 0.2862 0.093 Uiso 0.50 1 calc PR A -1 
H2C H 0.4749 0.2812 0.3065 0.093 Uiso 0.50 1 calc PR A -1 
C3 C 0.3951(13) 0.3381(11) 0.1661(10) 0.084(6) Uani 0.50 1 d PD A -1 
H3A H 0.4261 0.3175 0.1213 0.126 Uiso 0.50 1 calc PR A -1 
H3B H 0.4250 0.3804 0.1926 0.126 Uiso 0.50 1 calc PR A -1 
H3C H 0.3446 0.3594 0.1464 0.126 Uiso 0.50 1 calc PR A -1 
C4 C 0.3369(11) 0.1976(14) 0.1851(15) 0.107(10) Uani 0.50 1 d PD A -1 
H4A H 0.3380 0.2050 0.1274 0.161 Uiso 0.50 1 calc PR A -1 
H4B H 0.2817 0.1940 0.2032 0.161 Uiso 0.50 1 calc PR A -1 
H4C H 0.3651 0.1485 0.1989 0.161 Uiso 0.50 1 calc PR A -1 
C11 C 0.4407(4) 0.4407(4) 0.6767(5) 0.043(2) Uani 1 2 d S . . 
 
loop_ 
 _atom_site_aniso_label 
 _atom_site_aniso_U_11 
 _atom_site_aniso_U_22 
 _atom_site_aniso_U_33 
 _atom_site_aniso_U_23 
 _atom_site_aniso_U_13 
 _atom_site_aniso_U_12 
Os1 0.02833(16) 0.02833(16) 0.02833(16) 0.00156(9) 0.00156(9) -0.00156(9) 
Pd1 0.0398(3) 0.0398(3) 0.0398(3) -0.0067(2) -0.0067(2) -0.0067(2) 
P1 0.0474(9) 0.0474(9) 0.0474(9) -0.0097(9) -0.0097(9) -0.0097(9) 
O11 0.080(3) 0.080(3) 0.033(3) 0.000(2) 0.000(2) -0.022(6) 
C1 0.071(9) 0.061(8) 0.044(7) -0.024(6) -0.003(6) -0.010(7) 
C2 0.067(7) 0.047(9) 0.073(16) -0.011(11) 0.007(7) -0.002(6) 
C3 0.097(14) 0.104(16) 0.050(9) -0.003(9) 0.010(9) -0.018(12) 
C4 0.091(11) 0.13(3) 0.10(2) -0.084(16) -0.04(2) 0.02(2) 
C11 0.049(3) 0.049(3) 0.032(3) 0.005(2) 0.005(2) -0.006(4) 
 
_geom_special_details 
; 
 All esds (except the esd in the dihedral angle between two l.s. planes) 
 are estimated using the full covariance matrix.  The cell esds are taken 
 into account individually in the estimation of esds in distances, angles 
 and torsion angles; correlations between esds in cell parameters are only 
 used when they are defined by crystal symmetry.  An approximate (isotropic) 
 treatment of cell esds is used for estimating esds involving l.s. planes. 
; 
 
loop_ 
 _geom_bond_atom_site_label_1 
 _geom_bond_atom_site_label_2 
 _geom_bond_distance 
 _geom_bond_site_symmetry_2 
 _geom_bond_publ_flag 
Os1 C11 1.902(8) 8_656 ? 
Os1 C11 1.902(8) . ? 
Os1 C11 1.902(8) 11_566 ? 
Os1 Pd1 2.8063(9) . ? 
Os1 Pd1 2.8063(9) 3_656 ? 
Os1 Pd1 2.8063(9) 4_566 ? 
Os1 Os1 2.8634(7) 4_566 ? 
Os1 Os1 2.8635(7) 2_665 ? 
Os1 Os1 2.8635(7) 3_656 ? 
Pd1 P1 2.429(5) . ? 
Pd1 Os1 2.8062(9) 4_566 ? 
Pd1 Os1 2.8063(9) 3_656 ? 
P1 C1 1.948(16) 9 ? 
P1 C1 1.948(16) 21 ? 
P1 C1 1.948(16) 17 ? 
P1 C1 1.948(16) 5 ? 
P1 C1 1.948(16) . ? 
P1 C1 1.948(16) 13 ? 
O11 C11 1.136(11) . ? 
C1 C4 1.529(14) . ? 
C1 C3 1.531(14) . ? 
C1 C2 1.550(15) . ? 
 
loop_ 
 _geom_angle_atom_site_label_1 
 _geom_angle_atom_site_label_2 
 _geom_angle_atom_site_label_3 
 _geom_angle 
 _geom_angle_site_symmetry_1 
 _geom_angle_site_symmetry_3 
 _geom_angle_publ_flag 
C11 Os1 C11 92.1(4) 8_656 . ? 
C11 Os1 C11 92.1(4) 8_656 11_566 ? 
C11 Os1 C11 92.1(4) . 11_566 ? 
C11 Os1 Pd1 76.16(14) 8_656 . ? 
C11 Os1 Pd1 162.9(3) . . ? 
C11 Os1 Pd1 76.16(14) 11_566 . ? 
C11 Os1 Pd1 162.9(3) 8_656 3_656 ? 
C11 Os1 Pd1 76.16(14) . 3_656 ? 
C11 Os1 Pd1 76.16(14) 11_566 3_656 ? 
Pd1 Os1 Pd1 112.162(13) . 3_656 ? 
C11 Os1 Pd1 76.16(14) 8_656 4_566 ? 
C11 Os1 Pd1 76.16(14) . 4_566 ? 
C11 Os1 Pd1 162.9(3) 11_566 4_566 ? 
Pd1 Os1 Pd1 112.162(13) . 4_566 ? 
Pd1 Os1 Pd1 112.162(13) 3_656 4_566 ? 
C11 Os1 Os1 88.5(3) 8_656 4_566 ? 
C11 Os1 Os1 133.9(2) . 4_566 ? 
C11 Os1 Os1 133.9(2) 11_566 4_566 ? 
Pd1 Os1 Os1 59.323(12) . 4_566 ? 
Pd1 Os1 Os1 108.641(15) 3_656 4_566 ? 
Pd1 Os1 Os1 59.322(12) 4_566 4_566 ? 
C11 Os1 Os1 133.9(2) 8_656 2_665 ? 
C11 Os1 Os1 88.5(3) . 2_665 ? 
C11 Os1 Os1 133.9(2) 11_566 2_665 ? 
Pd1 Os1 Os1 108.641(15) . 2_665 ? 
Pd1 Os1 Os1 59.321(12) 3_656 2_665 ? 
Pd1 Os1 Os1 59.324(12) 4_566 2_665 ? 
Os1 Os1 Os1 60.0 4_566 2_665 ? 
C11 Os1 Os1 133.9(2) 8_656 3_656 ? 
C11 Os1 Os1 133.9(2) . 3_656 ? 
C11 Os1 Os1 88.5(3) 11_566 3_656 ? 
Pd1 Os1 Os1 59.324(12) . 3_656 ? 
Pd1 Os1 Os1 59.321(12) 3_656 3_656 ? 
Pd1 Os1 Os1 108.641(15) 4_566 3_656 ? 
Os1 Os1 Os1 60.0 4_566 3_656 ? 
Os1 Os1 Os1 60.0 2_665 3_656 ? 
P1 Pd1 Os1 143.905(15) . 4_566 ? 
P1 Pd1 Os1 143.905(15) . . ? 
Os1 Pd1 Os1 61.35(2) 4_566 . ? 
P1 Pd1 Os1 143.905(15) . 3_656 ? 
Os1 Pd1 Os1 61.36(2) 4_566 3_656 ? 
Os1 Pd1 Os1 61.35(2) . 3_656 ? 
C1 P1 C1 29.9(7) 9 21 ? 
C1 P1 C1 81.4(7) 9 17 ? 
C1 P1 C1 108.6(4) 21 17 ? 
C1 P1 C1 108.6(4) 9 5 ? 
C1 P1 C1 81.4(7) 21 5 ? 
C1 P1 C1 131.0(7) 17 5 ? 
C1 P1 C1 108.6(4) 9 . ? 
C1 P1 C1 131.0(7) 21 . ? 
C1 P1 C1 29.9(7) 17 . ? 
C1 P1 C1 108.6(4) 5 . ? 
C1 P1 C1 131.0(7) 9 13 ? 
C1 P1 C1 108.6(4) 21 13 ? 
C1 P1 C1 108.6(4) 17 13 ? 
C1 P1 C1 29.9(7) 5 13 ? 
C1 P1 C1 81.4(7) . 13 ? 
C1 P1 Pd1 110.3(4) 9 . ? 
C1 P1 Pd1 110.3(4) 21 . ? 
C1 P1 Pd1 110.3(4) 17 . ? 
C1 P1 Pd1 110.3(4) 5 . ? 
C1 P1 Pd1 110.3(4) . . ? 
C1 P1 Pd1 110.3(4) 13 . ? 
C4 C1 C3 111.4(11) . . ? 
C4 C1 C2 111.0(10) . . ? 
C3 C1 C2 107.7(11) . . ? 
C4 C1 P1 113.2(11) . . ? 
C3 C1 P1 107.4(10) . . ? 
C2 C1 P1 105.8(9) . . ? 
O11 C11 Os1 174.1(9) . . ? 
 
#===END
_diffrn_measured_fraction_theta_max    0.997 
_diffrn_reflns_theta_full              28.30 
_diffrn_measured_fraction_theta_full   0.997 
_refine_diff_density_max    1.975 
_refine_diff_density_min   -0.341 
_refine_diff_density_rms    0.205 
